# Supplementary material for: Aldehyde dehydrogenase 2 alleviates mitochondrial dysfunction by promoting PGC-1α-mediated biogenesis in acute kidney injury
Source: PubMed Central journal article supplement (PMC9860042; doi:10.1038/s41419-023-05557-x), 2023-01-20
Supplement: 41419_2023_5557_MOESM1_ESM.pdf [file 41419_2023_5557_MOESM1_ESM.pdf]

## Figure S1

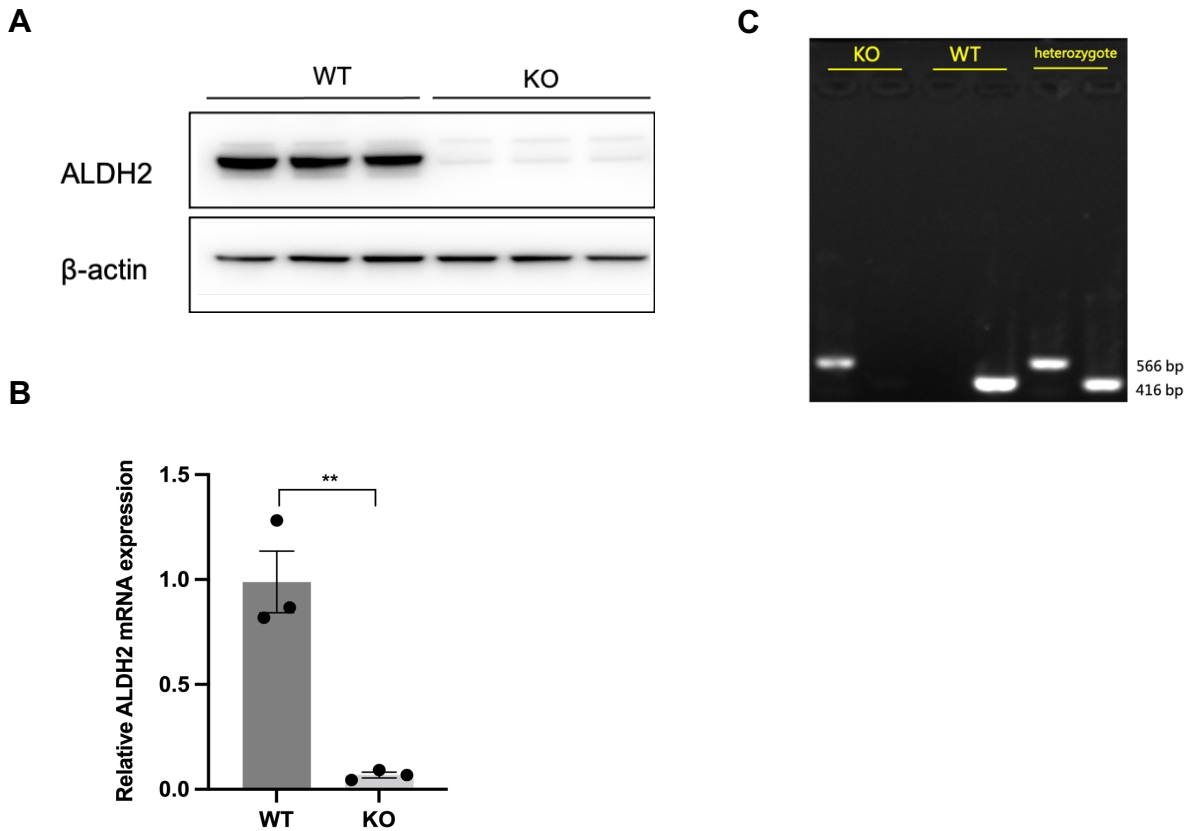

**Figure S1 The genotyping for ALDH2 KO mice.** (A) Western blot analysis of ALDH2 in WT and KO mice (WT, n = 3; KO, n = 3). (B) Relative mRNA expression of ALDH2 in WT and KO mice (n=6). (C) Images of PCR analysis genotyping the WT, ALDH2 KO and heterozygote mice. (KO, knockout; WT, wild type)

The following primers were used for genotyping.

Primers 1 (product size: 566 bp):

F1: 5'-GACCTATAGAATTCAGCAAACGGA-3'

R1: 5'-GAAGACTGTCAACTGTGAAAGACAG-3'

Primers 2 (product size: 416 bp):

F1: 5'-GACCTATAGAATTCAGCAAACGGA-3'

R2: 5'-CAGGTTAGAAGCACAAGTCTAGC-3'

KO is one band with 566 bp, WT is one band with 416 bp and heterozygous is two bands with 566 bp and 416 bp.

## Figure S2

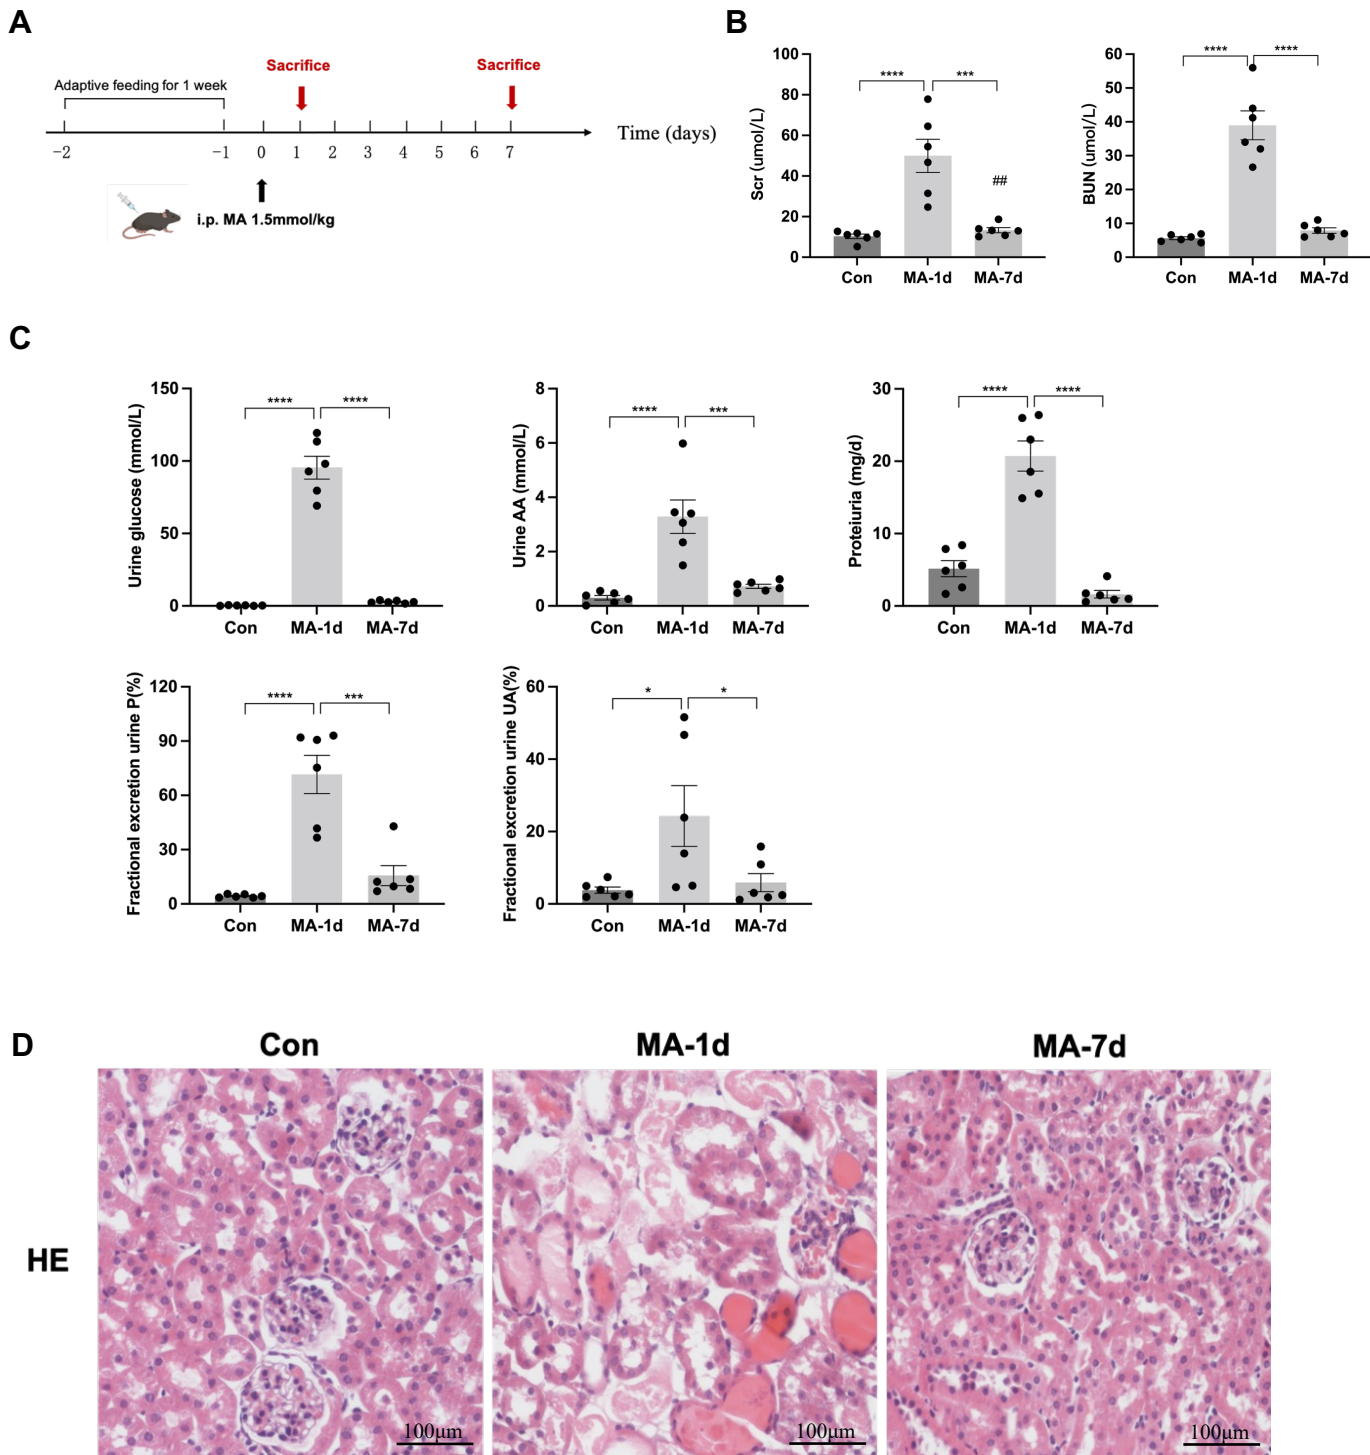

**Figure S2 Maleic acid (MA) induced an experimental model of Fanconi syndrome in mice.**

(A) Mice were intraperitoneally injected with a single dose of MA (1.5mmol/kg) and were sacrificed on the 1st day and 7th day. (B) Scr and BUN levels were measured in each group (n=6). (C) The criterion of Fanconi syndrome was evaluated in each group (n=6). (D) Images of HE staining (n=6). Scale bars, 100μm. \* $P < 0.05$ , \*\*  $P < 0.01$ , \*\*\*  $P < 0.001$ , \*\*\*\*  $P < 0.0001$ . (Con, Control; MA, maleic acid).

**Figure S3**

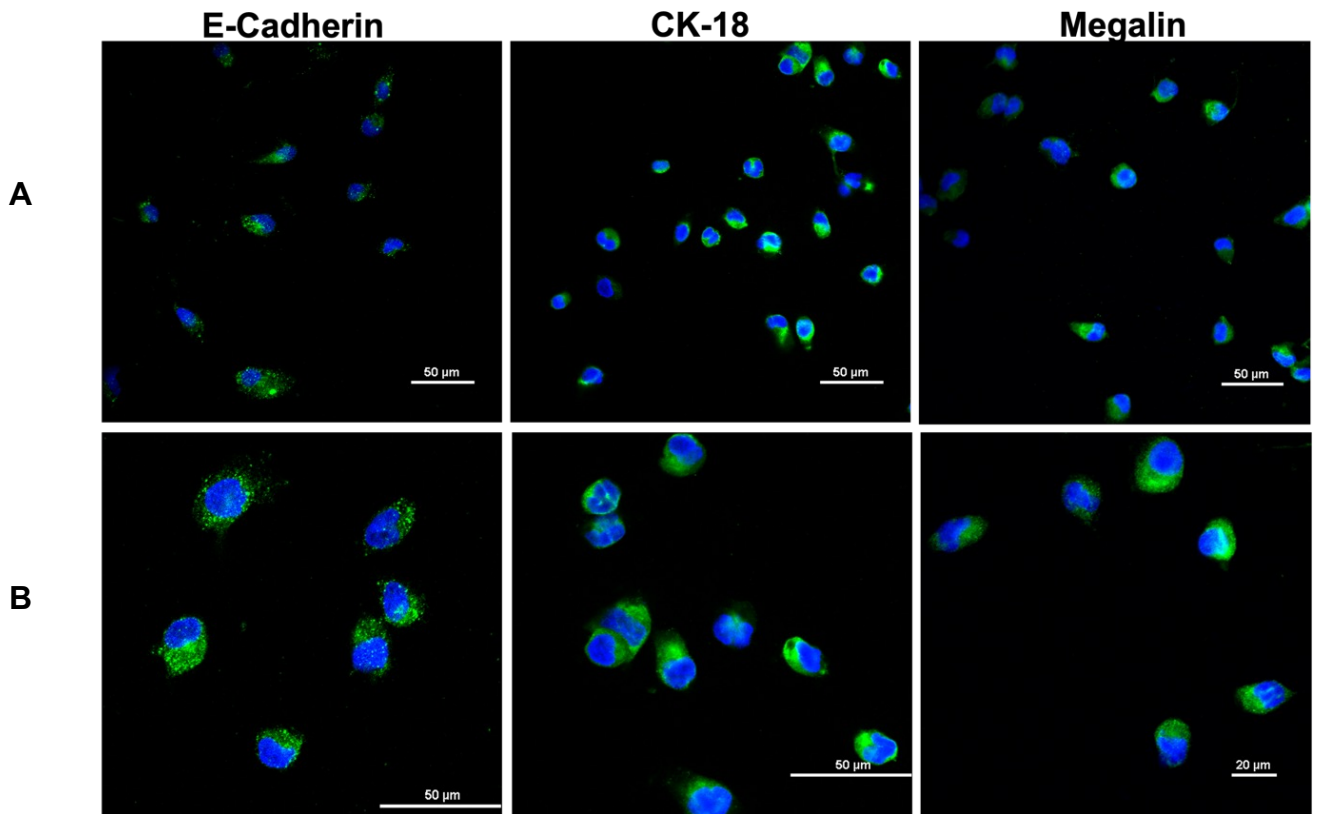

**Figure S3 Identification of HK-2 cells.** (A-B) Immunofluorescence of HK-2 cells markers. Scale bars, 50μm.

**Figure S4**

**A**

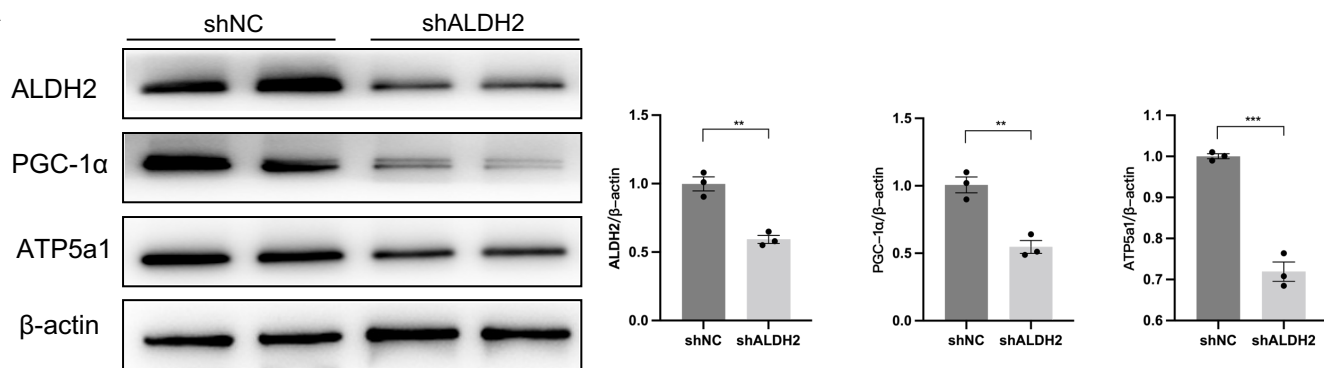

**B**

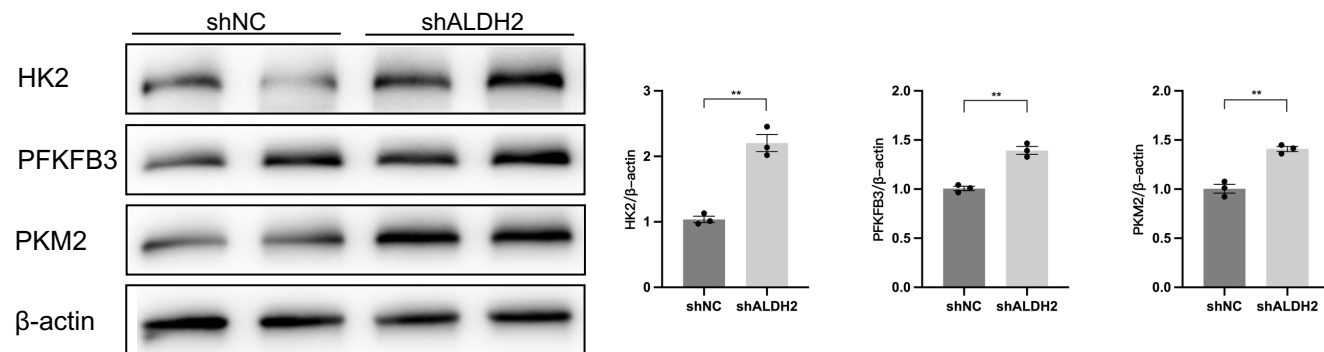

**C**

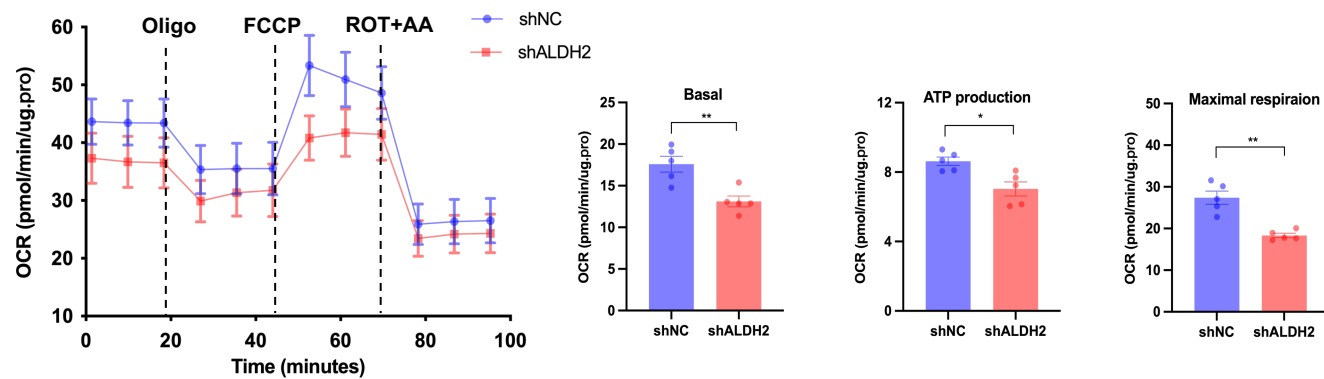

**D**

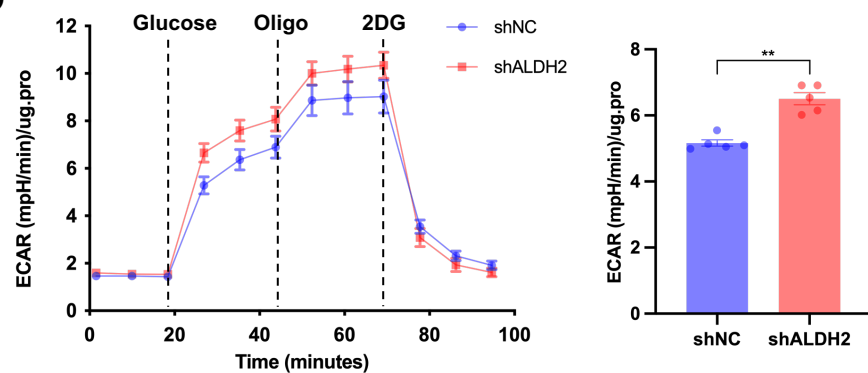

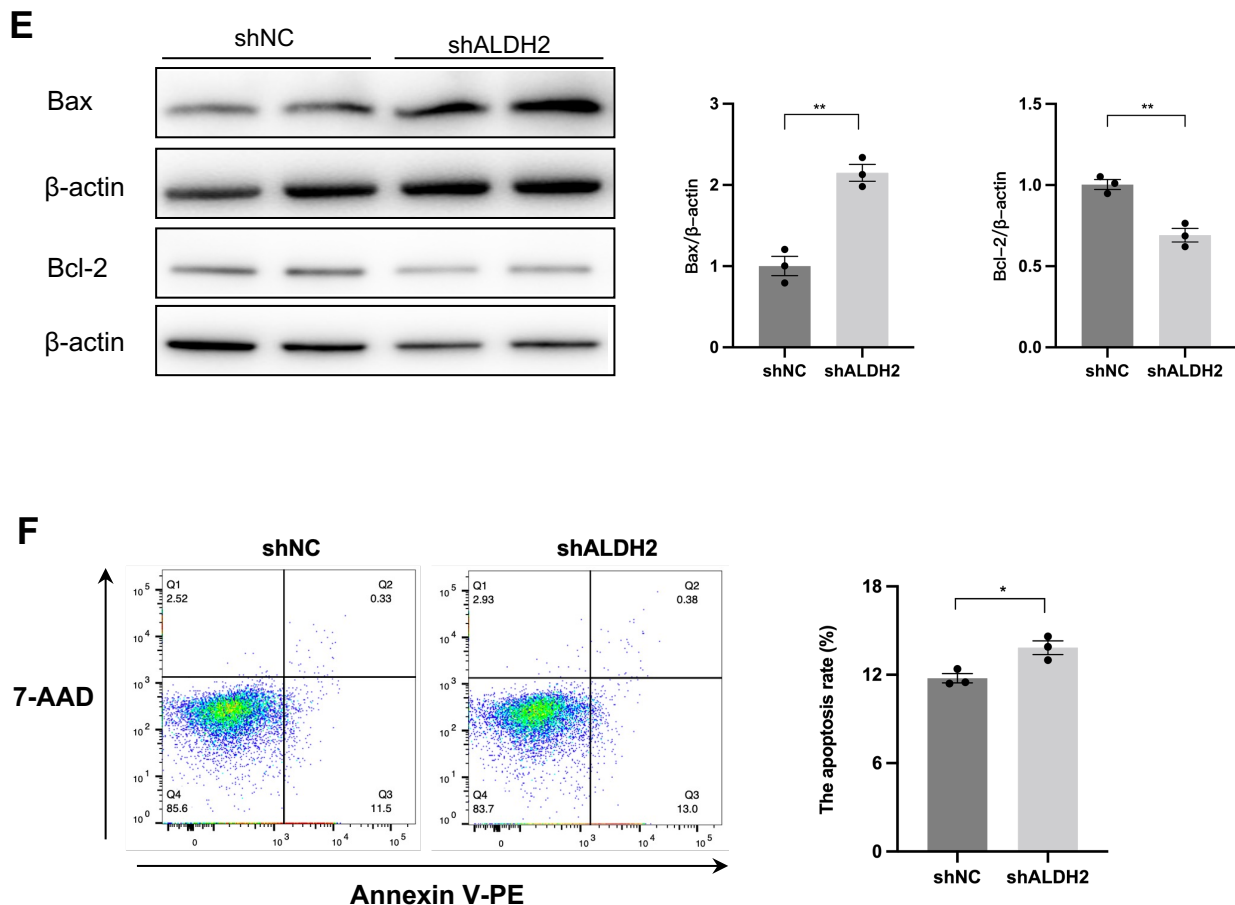

**Figure S4 ALDH2 knockdown aggravated the disruption of mitochondria and apoptosis in MA-induced HK-2 cells.** HK-2 cells were transfected with ALDH2 shRNA (shALDH2) or negative control shRNA (shNC) plasmid for 6h. (A) The expression of mitochondria-related proteins (ALDH2, PGC-1 $\alpha$  and ATP5a1) was measured by western blotting (n=3). (B) The expression of aerobic glycolysis-related enzymes (HK2, PFKFB3 and PKM2) was measured by western blotting (n=3). (C) Measurement of mitochondrial oxygen consumption ratio (OCR) in HK-2 cells (n=5). (D) Measurement of mitochondrial extra cellular acidification rate (ECAR) in HK-2 cells (n=5). (E) The expression of apoptosis-related proteins (Bax and Bcl-2) was measured by western blotting (n=3). (F) Apoptosis was determined by flow cytometry in 2 groups (n=3). \* $P < 0.05$ , \*\* $P < 0.01$ , \*\*\* $P < 0.001$ . (shNC, negative control shRNA; shALDH2, ALDH2 shRNA)

## Figure S5

**A**

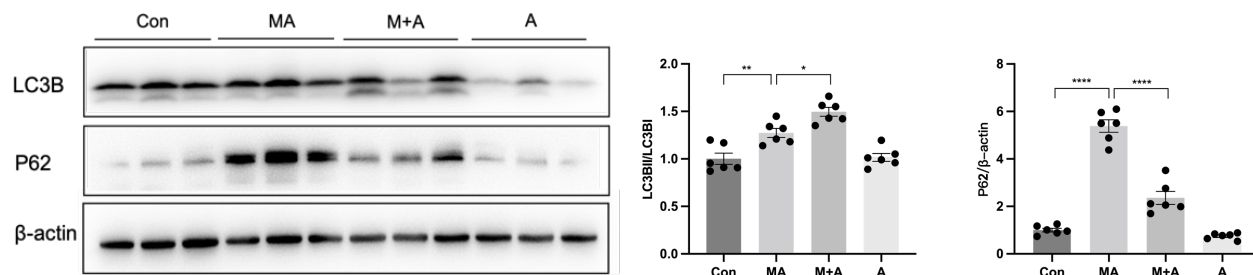

**B**

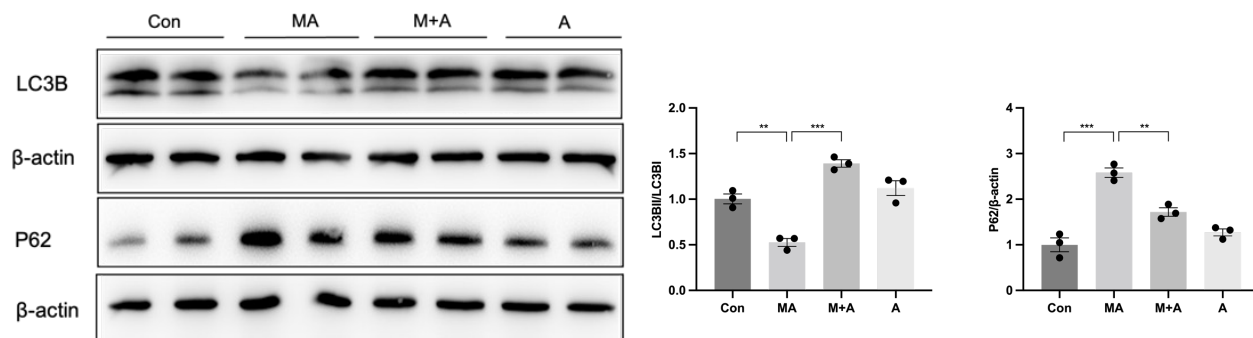

**C**

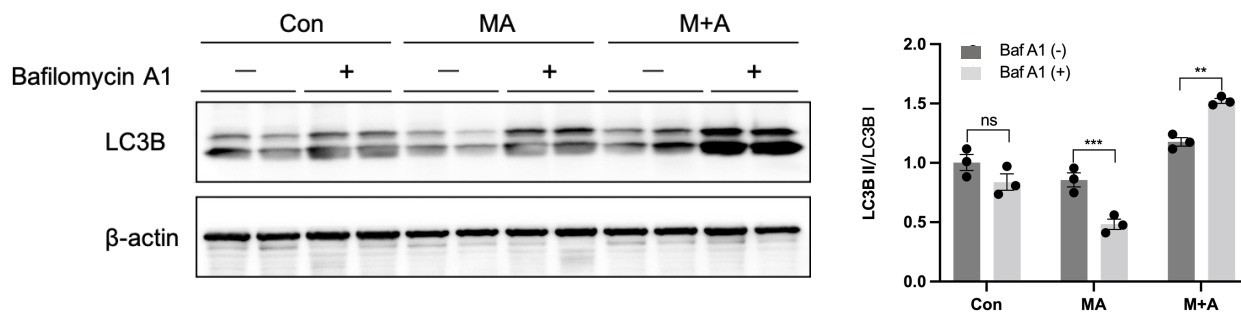

**Figure S5 ALDH2 activated autophagy in MA-induced mice and HK-2 cells.** (A-B) The expression of autophagy-related proteins (LC3B and P62) was analyzed by western blot in mice ( $n=6$ ) and HK-2 cells ( $n=3$ ). (C) The expression of autophagy-related proteins LC3B was analyzed in HK-2 cells stimulated by autophagic inhibitor Baf A1 ( $n=3$ ). \*  $P < 0.05$ , \*\*  $P < 0.01$ , \*\*\*  $P < 0.001$ , \*\*\*\*  $P < 0.0001$  (Con, Control; MA, maleic acid; M+A, maleic acid + Alda-1; A, Alda-1; Baf A1, Bafilomycin A1).

**Figure S6**

**A**

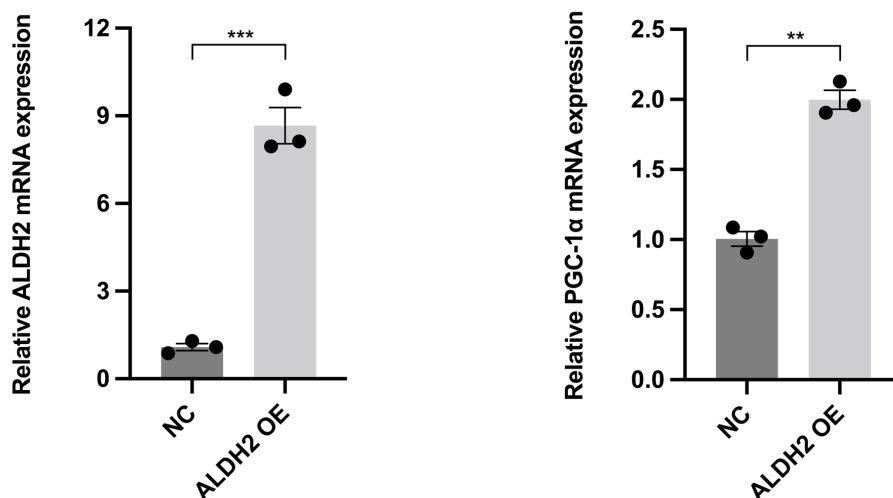

**B**

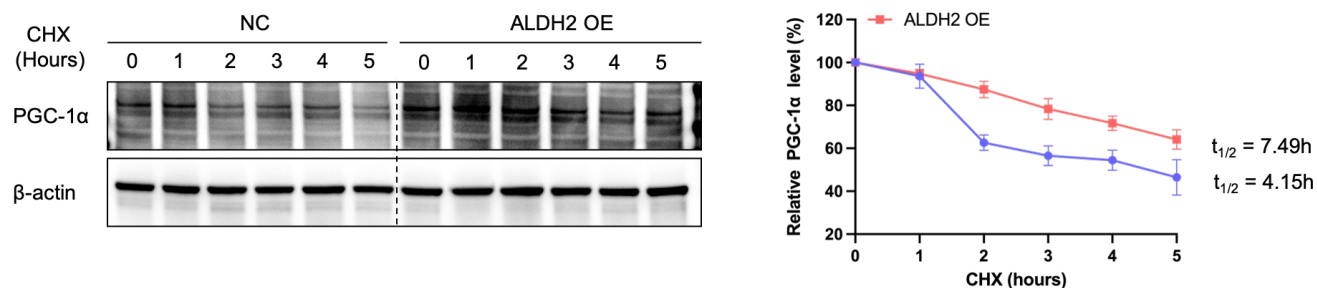

**Figure S6 ALDH2 enhanced the expression of PGC-1 $\alpha$  by transcriptional and protein half-life**

**regulation.** (A) The relative mRNA expression of ALDH2 and PGC-1 $\alpha$  was measured in NC and ALDH2 overexpression HK-2 cells (n=3). (B) Cycloheximide (CHX) chase assay for PGC-1 $\alpha$  in NC and ALDH2 overexpression HK-2 cells treated with CHX (200  $\mu$ g/ml) for the indicated time points.

\* $P < 0.05$ , \*\*  $P < 0.01$ , \*\*\* $P < 0.001$ . (NC, normal control; OE, overexpression; CHX, Cycloheximide)

**Table S1 Primers used for real-time PCR analysis.**

| <b>Gene</b>    | <b>Sequence 5'-3'</b>                               | <b>Species</b> |
|----------------|-----------------------------------------------------|----------------|
| ALDH2          | F: AGAAGATCCTCGGCTACAT<br>R: CTCCTTGGCAATGGTCAT     | Mouse          |
| PGC-1 $\alpha$ | F: GACACAACACGGACAGAA<br>R: CACAGGTATAACGGTAGGTAA   |                |
| mtND1          | F: CACACCCTAGCAGAAACAAACC<br>R: GGCCGGCTGCGTATTCTAC |                |
| $\beta$ -actin | F: CACTGTCGAGTCGCGTCC<br>R: TCATCCATGGCGAACTGGTG    |                |



**Table S2 Primary antibodies used in this study.**

| <b>Antibody</b> | <b>Source</b> | <b>Catalog</b> |
|-----------------|---------------|----------------|
| ALDH2           | Abcam         | ab227021       |
| KIM-1           | Abcam         | ab78494        |
| 4HNE            | Abcam         | ab46545        |
| PGC-1 $\alpha$  | ABclonal      | A12348         |
| ATP5a1          | Proteintech   | 14676-1-AP     |
| HK2             | Abcam         | ab209847       |
| PFKFB3          | Abcam         | ab181861       |
| PKM2            | CST           | #4053          |
| Bax             | ABclonal      | A19684         |
| Bcl-2           | ABclonal      | A19693         |
| SGLT2           | ABclonal      | A20271         |
| URAT1           | Proteintech   | 14937-1-AP     |
| NPT2a           | ABclonal      | A13635         |
| Flag            | Proteintech   | 66008-4-Ig     |
| $\beta$ -actin  | ABclonal      | AC038          |
| GAPDH           | ABclonal      | AC033          |
| Histone H3      | Proteintech   | 17168-1-AP     |
